# Supplementary material for: Traffic Flow Detection Using Camera Images and Machine Learning Methods in ITS for Noise Map and Action Plan Optimization
Source: MDPI journal article supplement (doi:10.3390/s22051929), 2022-03-01
Supplement: s1 [file s1]

## Supplementary Materials

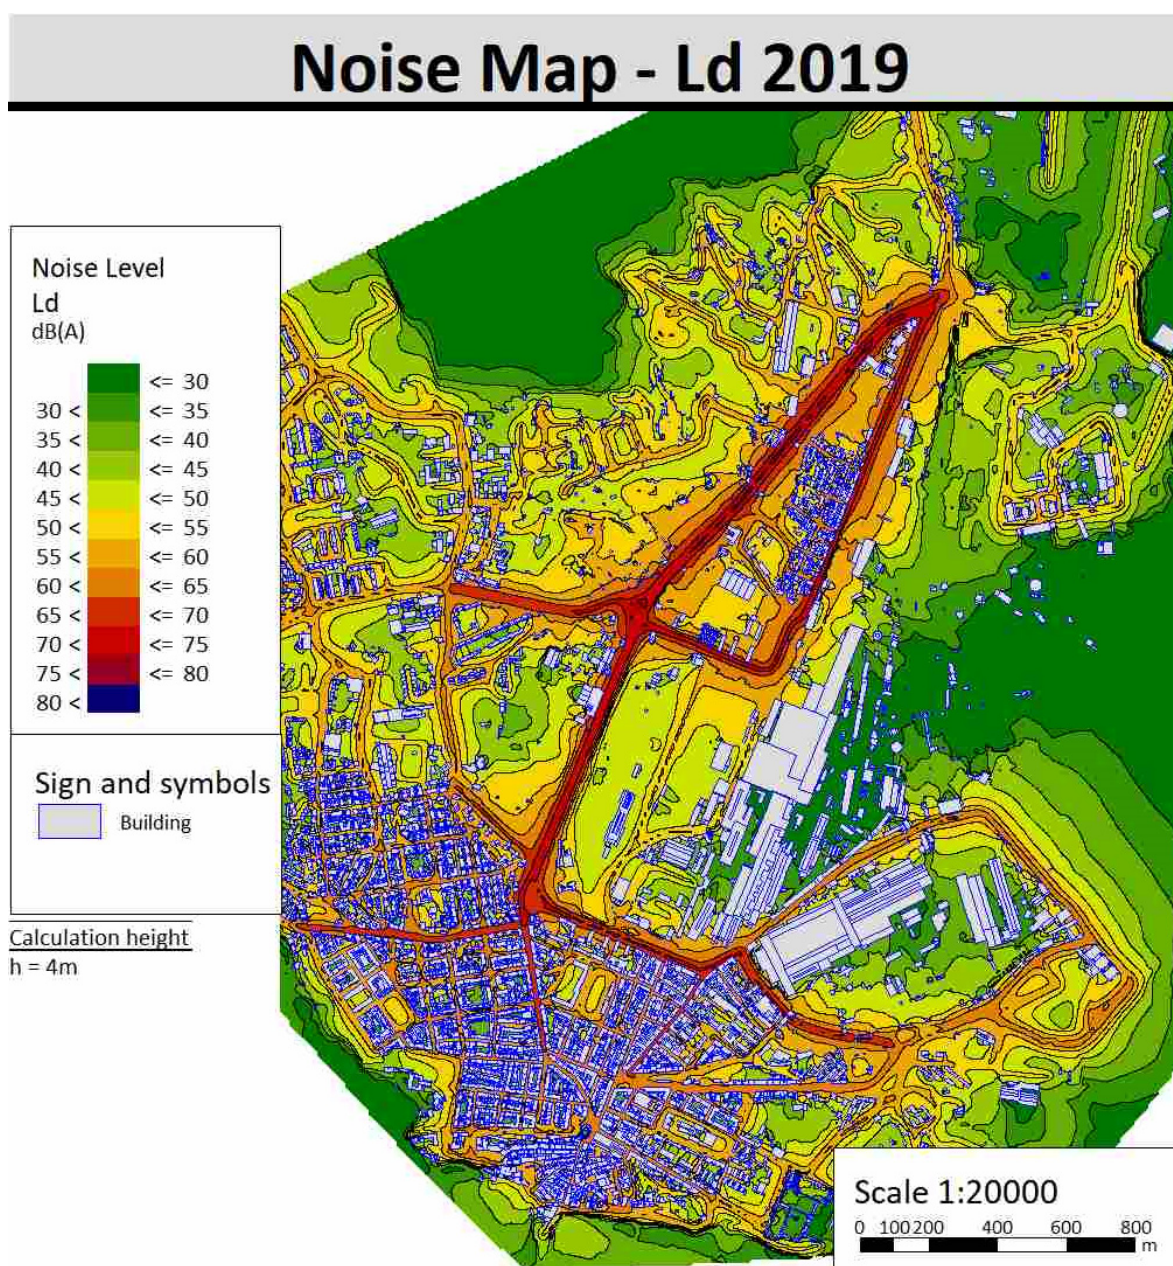

**Figure S1.** Noise maps of Piombino with  $L_d$  indicator for 2019.



# Noise Map - Le 2019

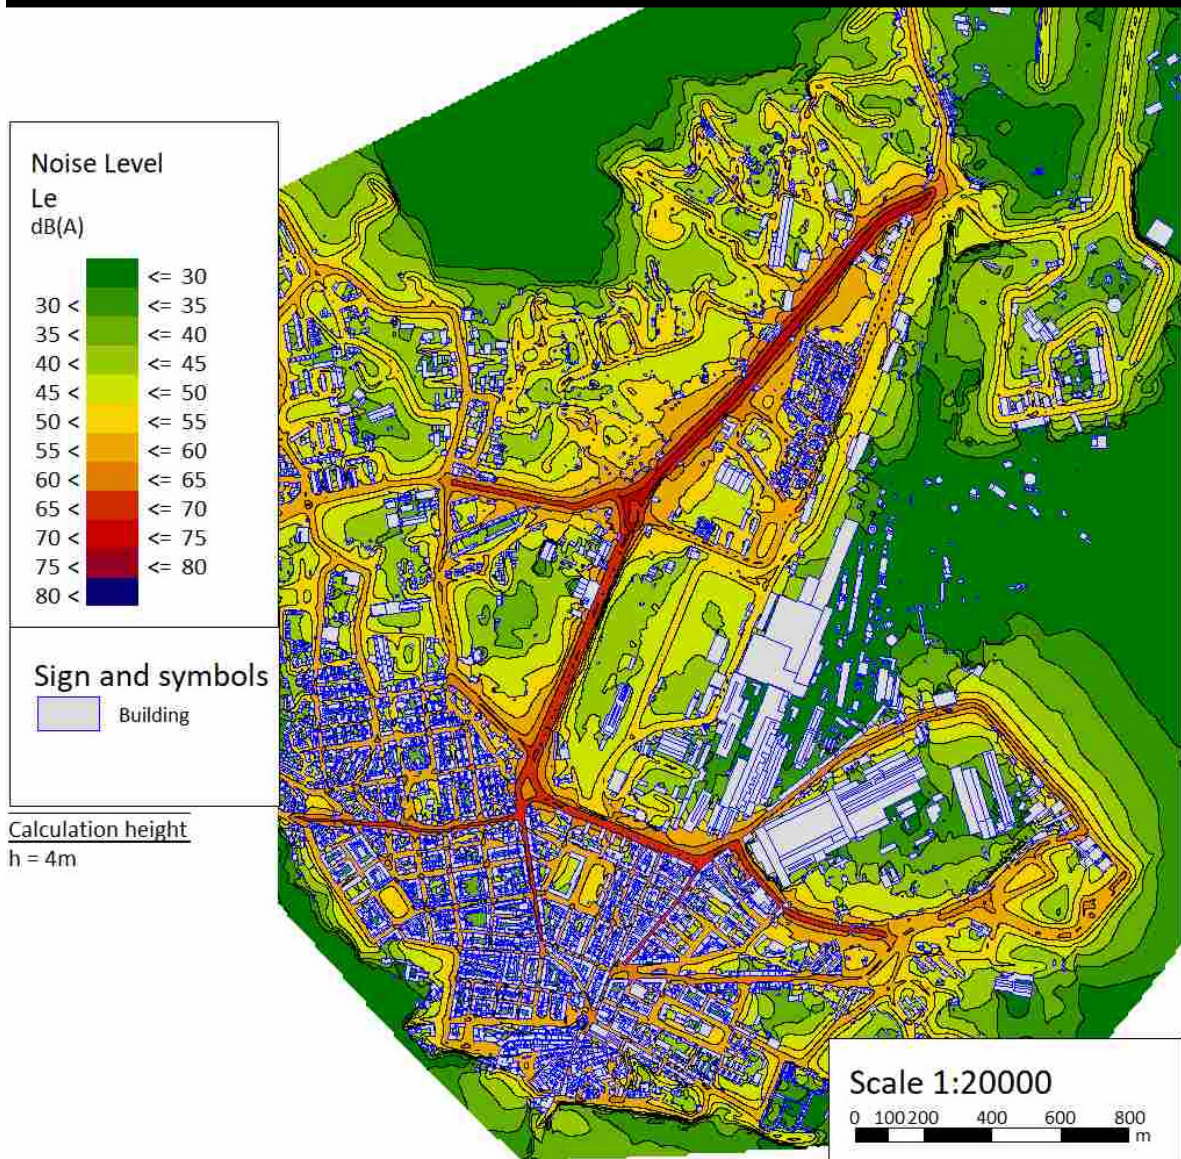

Figure S2. Noise maps of Piombino with Le indicator for 2019.



# Noise Map - Lden 2021

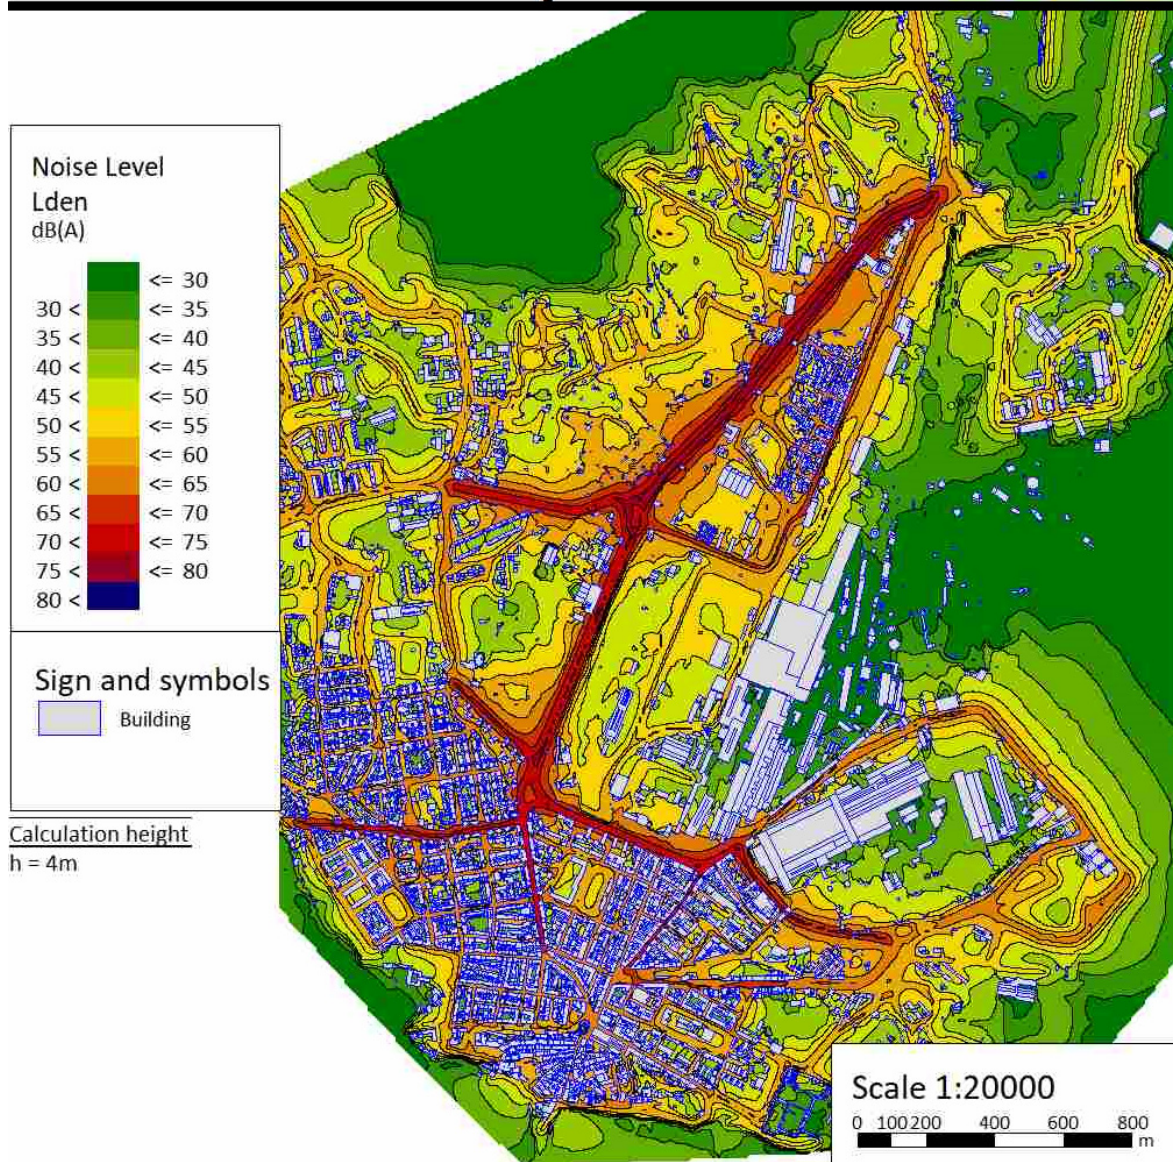

Figure S3. Noise maps of Piombino with  $L_{den}$  indicator for 2021.



# Noise Map - Ld 2021

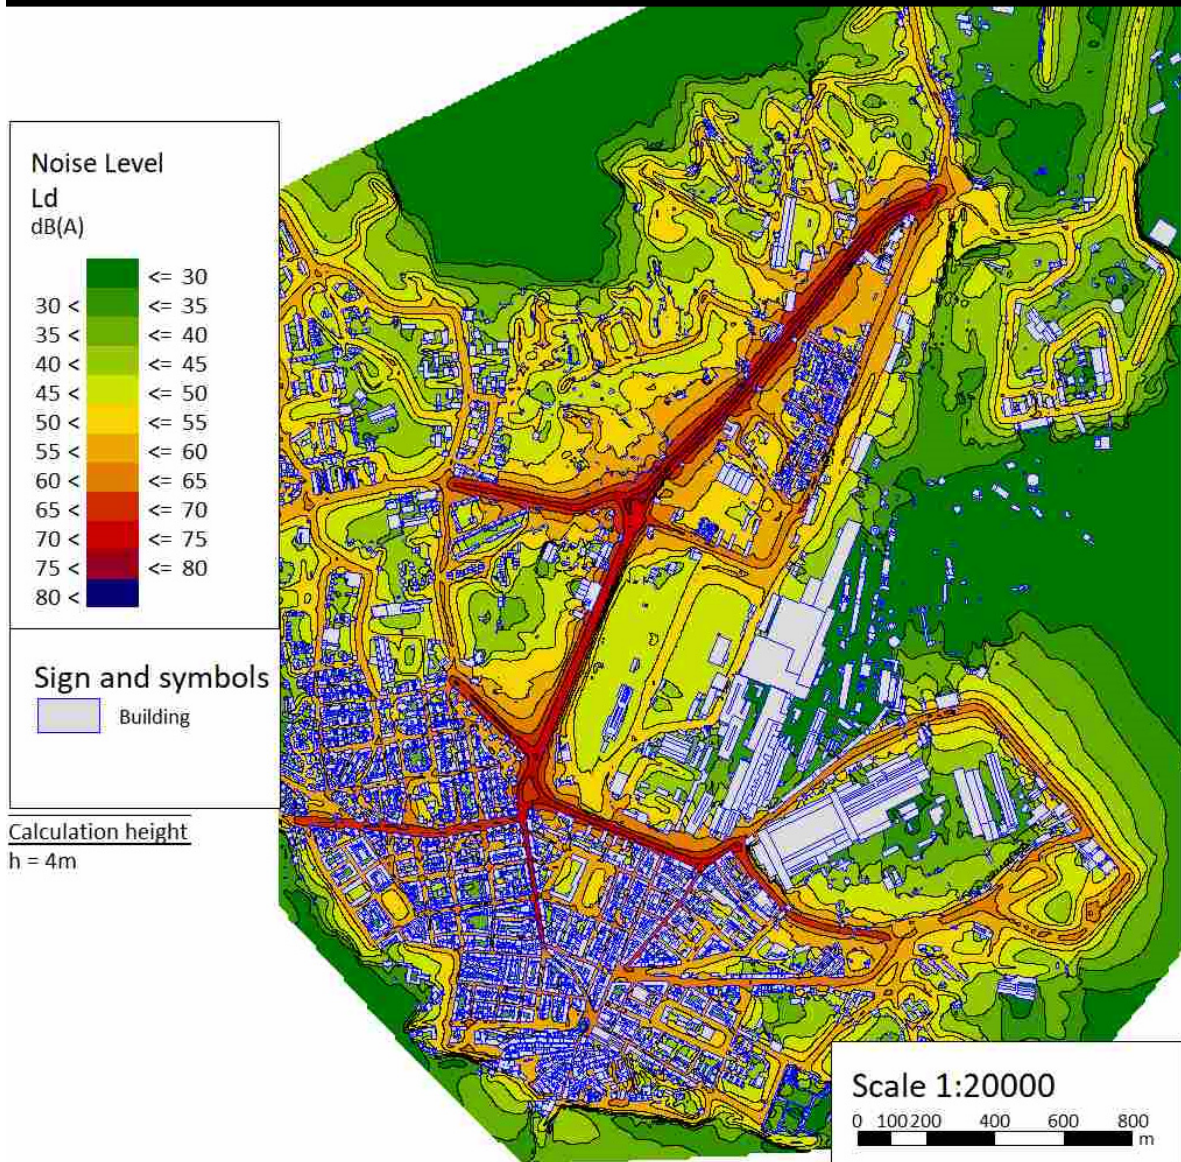

Figure S4. Noise maps of Piombino with Ld indicator for 2021.



# Noise Map - Le 2021

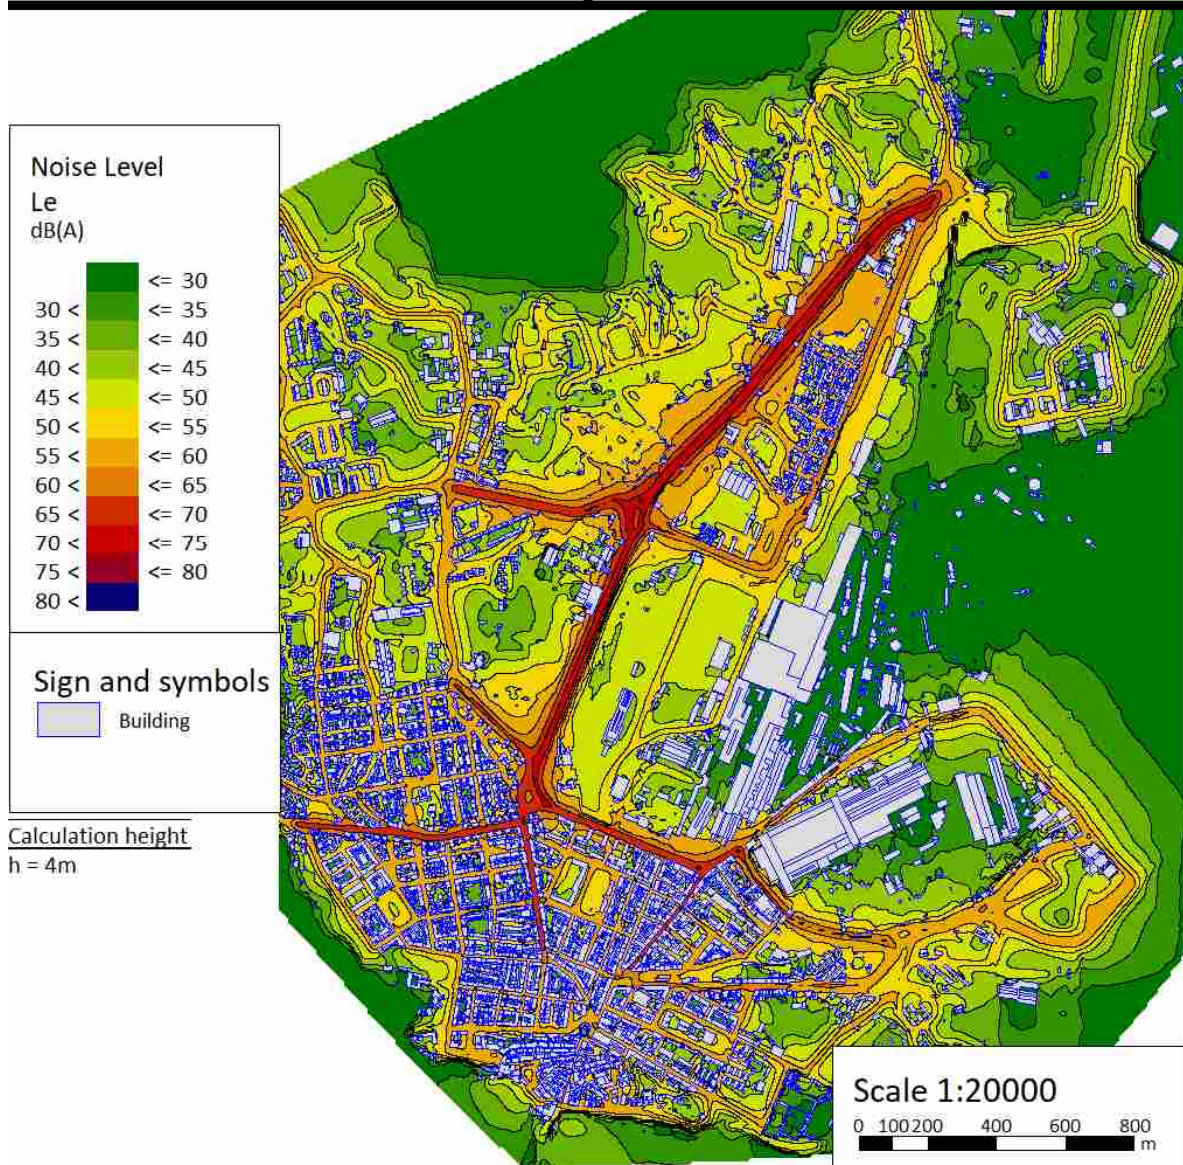

Figure S5. Noise maps of Piombino with Le indicator for 2021.



# Noise Map - Ln 2021

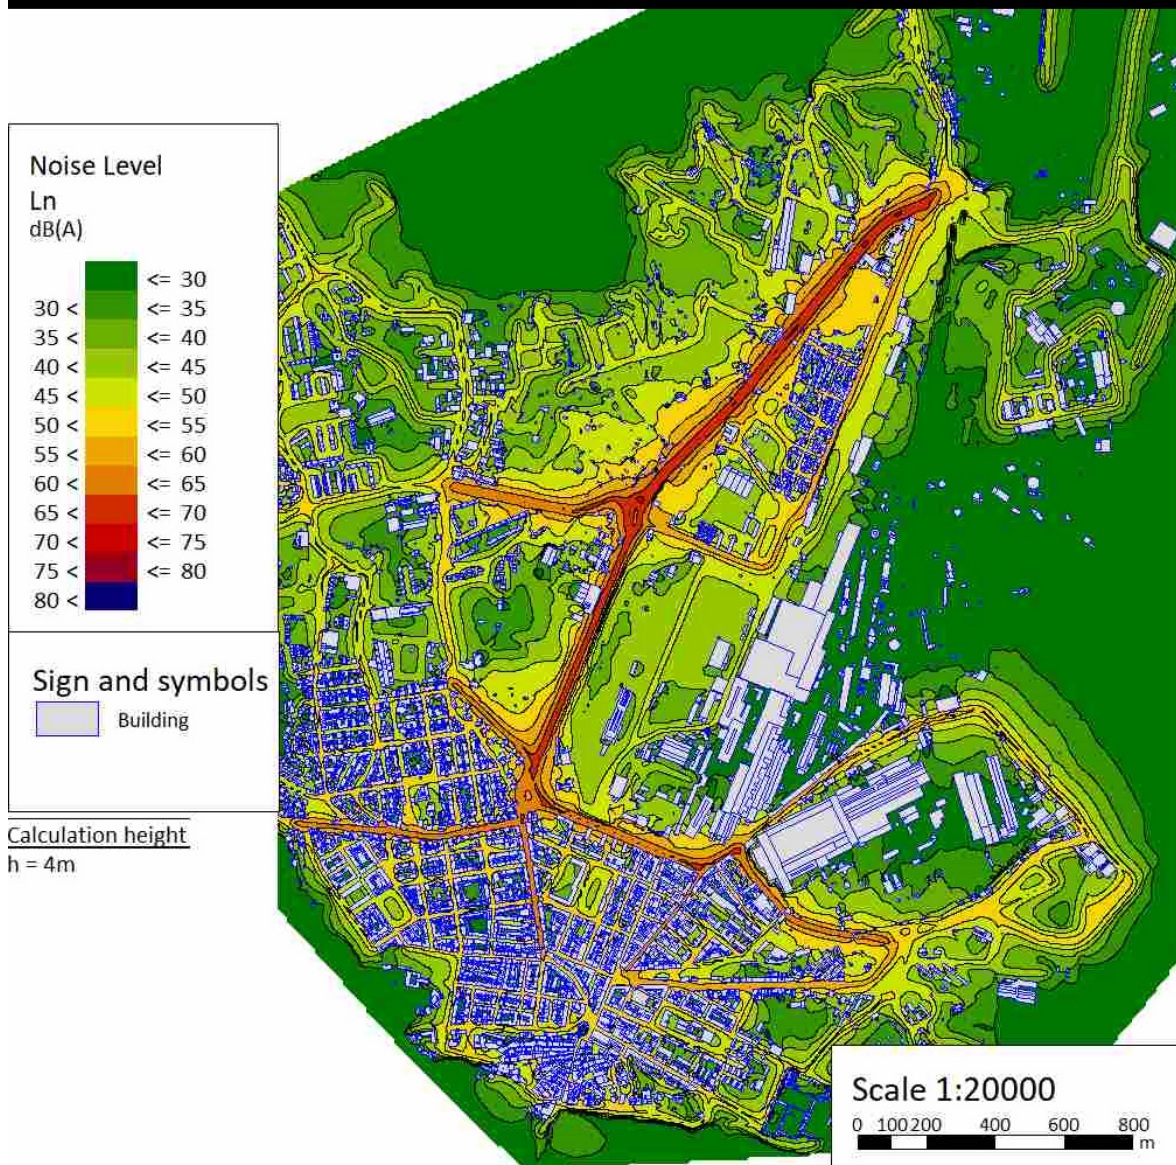

Figure S6. Noise maps of Piombino with  $L_n$  indicator for 2021.



# Difference Map 2021-2019 Ld

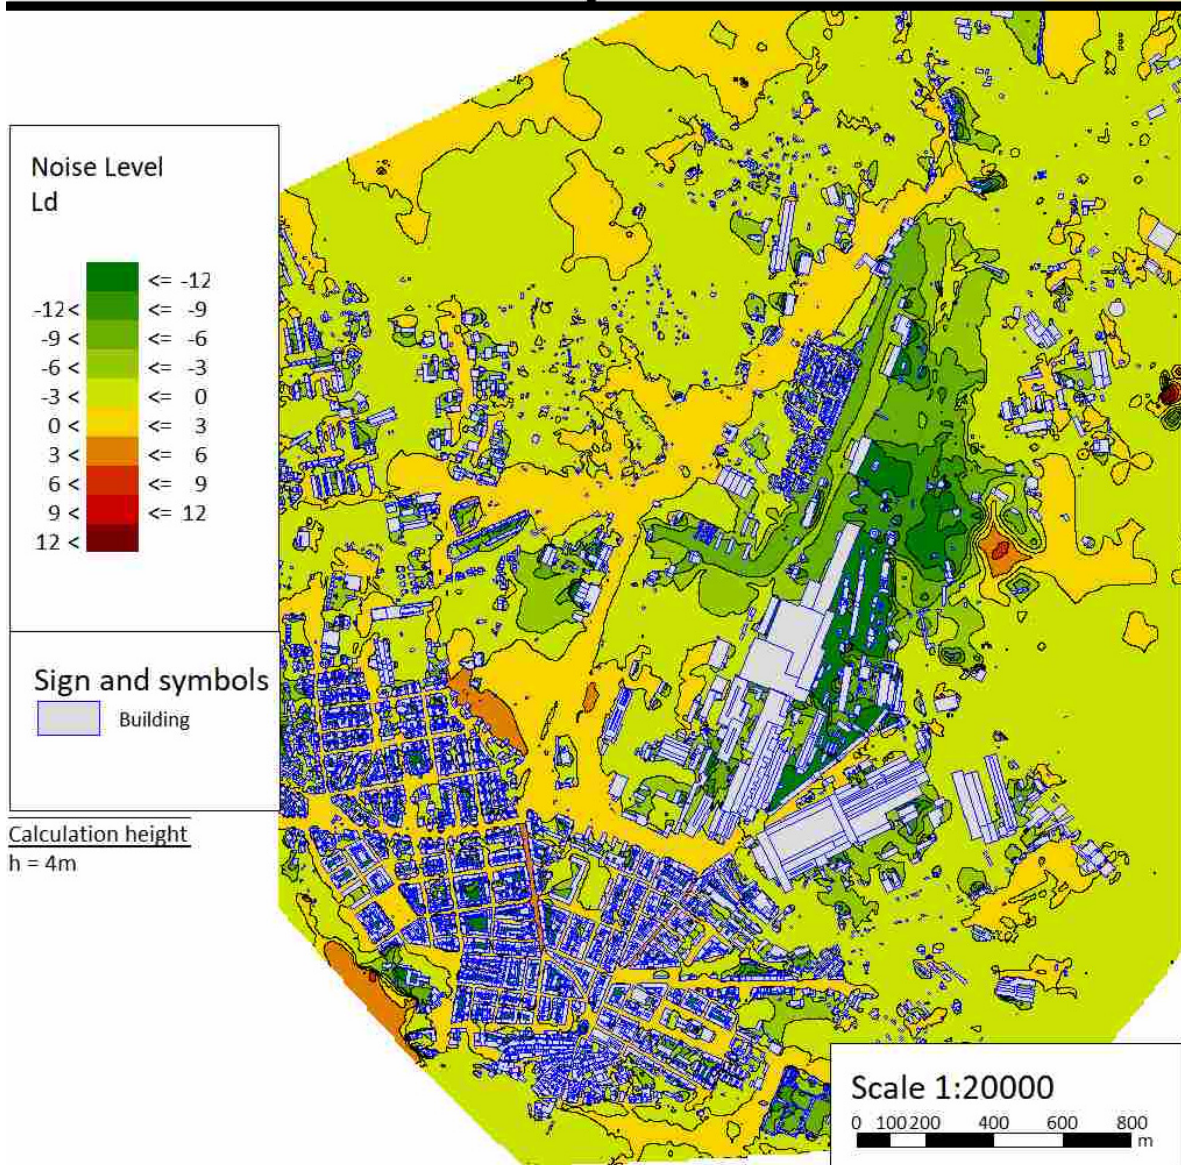

Figure S7. Difference maps of noise for 2021–2019 with  $L_d$  indicator.



# Difference Map 2021-2019 Le

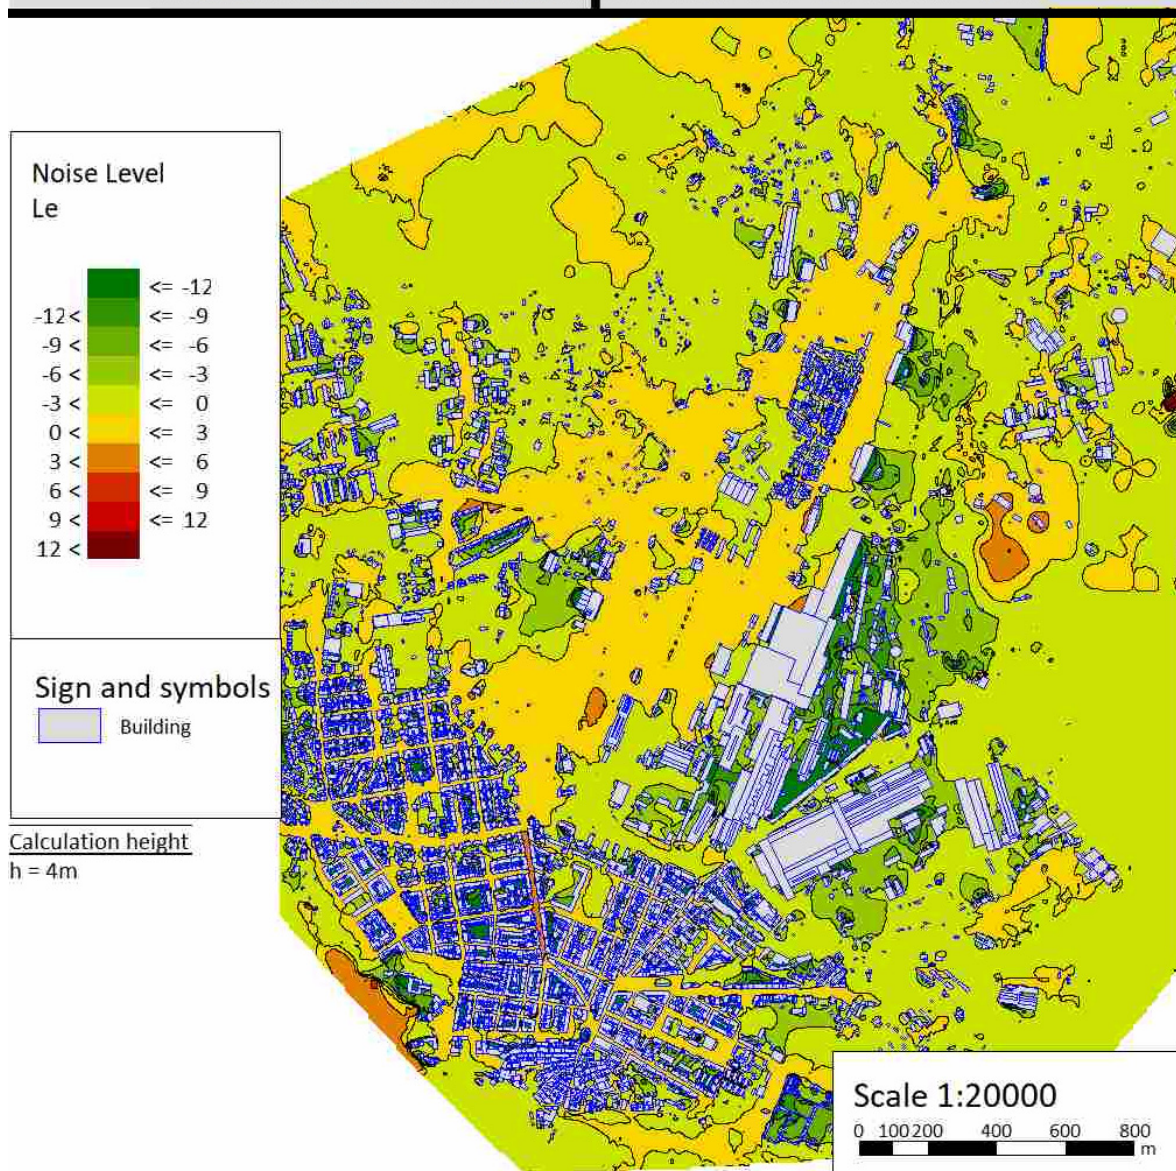

Figure S8. Difference maps of noise for 2021–2019 with Le indicator.
